# Supplementary material
Source: ML conference proceedings conference paper supplement (https://aclanthology.org/2020.wnut-1.21)
Supplement: OptionalSupplementaryMaterial [file 2020.wnut-1.21.OptionalSupplementaryMaterial.zip]

## A Appendices

### A.1 List of Features Extracted from Speech and Transcripts

Full list of lexico-syntactic, discourse mapping and additional language features is in Table A.1, all with brief descriptions and counts of sub-types. Spacy<sup>2</sup> is used for part-of-speech tagging in the linguistic pipeline, where tags belong to Penn Treebank<sup>3</sup>.

### A.2 Noise Addition Method

The strategy followed to add  $k$  level of noise ( $\epsilon$ ) to an input  $X_i$  is as follows:

$$X_{i,j}^{noised^k} = X_{i,j} + \epsilon \quad (4)$$

$$\epsilon \sim \mathcal{N}(0, \sigma_{new}^2) \quad (5)$$

$$\sigma_{new} = k * \sigma \quad (6)$$

where  $i$  is a sample number,  $j$  is a feature number, and standard deviation of noise added is  $k$  times the standard deviation of the original unperturbed feature,  $\sigma$ . Note that the standard deviation ( $\sigma$ ) per feature is calculated over *all* samples.

### A.3 Classification Setup Details

**Hyperparameter Settings:** All 2 hidden layers of our network have 10 units each (Pedregosa et al., 2011). We use the Adam optimizer (Kingma and Ba, 2014) with an initial learning rate of 0.001 and  $L2$  regularization parameter for network weights set to 0.0001. The model is trained to a maximum of 200 epochs.

**Evaluation:** For classification experiments on all datasets (DB and HA, varying levels of artificial errors), we perform 10-fold cross-validation stratified at subject level (ensuring that speech samples from the same subject do not in the training and testing sets in each fold). The F1 (macro) - score, averaged across the 10 folds, is chosen as our primary evaluation metric, given the imbalanced nature of our dataset.

---

<sup>2</sup><https://spacy.io/usage/linguistic-features>

<sup>3</sup><http://www.cis.upenn.edu/treebank/>

| Feature type                    | #Features | Brief Description                                                                                                                                    |
|---------------------------------|-----------|------------------------------------------------------------------------------------------------------------------------------------------------------|
| Syntactic Complexity            | 36        | L2 Syntactic Complexity Analyzer (Lu, 2010) features; max/min utterance length, depth of syntactic parse tree                                        |
|                                 | 104       | Number of times a production type occurs divided by total number of productions                                                                      |
|                                 | 13        | Proportion, average length and rate of phrase types                                                                                                  |
| Lexical Complexity and Richness | 12        | Average norms across all words, across nouns only and across verbs only for imageability, age of acquisition, familiarity and frequency (commonness) |
|                                 | 6         | Type-token ratios (including moving window); brunet; Honoré's statistic                                                                              |
|                                 |           | Proportion of demonstratives (e.g., "this"), function words,                                                                                         |
|                                 | 5         | light verbs and inflected verbs, and propositions (POS tag verb, adjective, adverb, conjunction, or preposition)                                     |
|                                 | 3         | Ratios nouns:(nouns+verbs); nouns:verbs; pronouns:(nouns+pronouns)                                                                                   |
|                                 | 1         | Average word length                                                                                                                                  |
|                                 | 18        | Proportions of Spacy universal POS tags                                                                                                              |
| Discourse Mapping               | 53        | Proportions of Penn Treebank POS tags                                                                                                                |
|                                 | 15        | Avg/max/min similarity between word2vec (Mikolov et al., 2013) representations of utterances (with different dimensions)                             |
|                                 | 5         | Fraction of pairs of utterances below a similarity threshold (0.5,0.3,0); avg/min distance                                                           |
|                                 | 13        | Representing words as nodes in a graph and computing density, number of loops, etc.                                                                  |
|                                 | 1         | Number of switches in verb tense across utterances divided by total number of utterances                                                             |
| Additional Features             | 15        | Avg/min/max cosine distance between word2vec (Mikolov et al., 2013) utterances and picture content units, with varying dimensions of word2vec        |
|                                 | 2         | Ratios – number of words: duration of audio; number of syllables: duration of speech,                                                                |
|                                 | 1         | Proportion of words not in the English dictionary                                                                                                    |
|                                 | 9         | Average sentiment valence, arousal and dominance across all words, noun and verbs                                                                    |
|                                 | 7         | Total and mean duration of pauses; long and short pause counts;                                                                                      |
|                                 |           | pause to word ratio; fillers(um,uh); duration of pauses to word durations                                                                            |
|                                 | 4         | Avg/min/max/median fundamental frequency of audio                                                                                                    |
|                                 | 2         | Duration of audio and spoken segment of audio                                                                                                        |
|                                 | 4         | Avg/variance/skewness/kurtosis of zero-crossing rate                                                                                                 |
|                                 | 168       | Avg/variance/skewness/kurtosis of 42 Mel-frequency Cepstral Coefficients (MFCC) coefficients                                                         |
|                                 | 10        | Proportion of lemmatized words, relating to the Cookie Theft picture content units to total number of content units                                  |

Table A.1: Summary of all lexico-syntactic features extracted. The number of features in each subtype is shown in the second column (titled “#Features”).
